# Supplementary material for: Impact of the Chemical Structure of Photoreactive Urethane (Meth)Acrylates with Various (Meth)Acrylate Groups and Built-In Diels–Alder Reaction Adducts on the UV-Curing Process and Self-Healing Properties
Source: MDPI journal article supplement (doi:10.3390/polym15040924), 2023-02-12
Supplement: s1 [file s1]

# Impact of the Chemical Structure of Photoreactive Urethane (Meth)Acrylates with Various (Meth)Acrylate Groups and Built-in Diels–Alder Reaction Adducts on the UV-Curing Process and Self-Healing Properties

Paulina Bednarczyk \*, Karolina Mozelewska, Joanna Klebko, Joanna Rokicka and Paula Ossowicz-Rupniewska

Department of Chemical Organic Technology and Polymeric Materials, Faculty of Chemical Technology and Engineering, West Pomeranian University of Technology in Szczecin, Piastów Ave. 42, 71-065 Szczecin,

Poland; karolina\_mozelewska@zut.edu.pl (K.M.); joanna.klebko@zut.edu.pl (J.K.); joanna.rokicka@zut.edu.pl (J.R.); paula.ossowicz@zut.edu.pl (P.O.-R.)

\* Correspondence: bednarczyk.pb@gmail.com or paulina.bednarczyk@zut.edu.pl

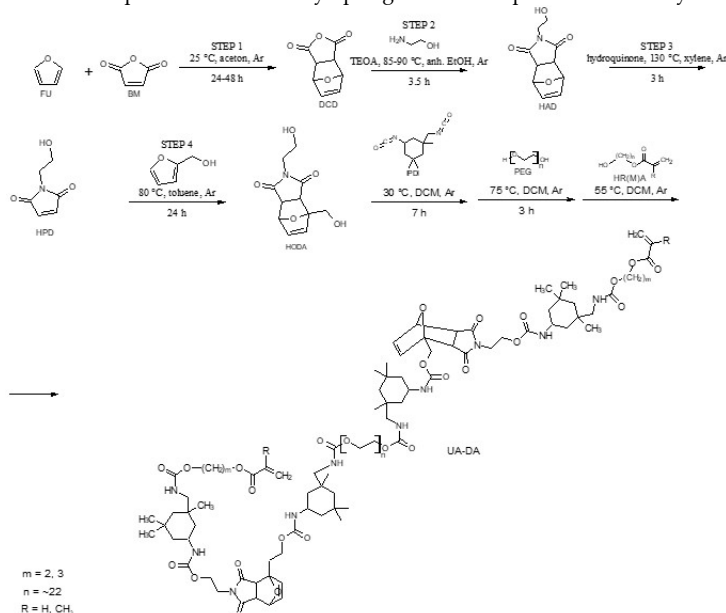

**Figure S1.** The whole synthetic route of the self-healing urethane (meth)acrylates synthesis  
**<sup>1</sup>H, <sup>13</sup>C NMR and FT-IR spectra of intermediate products and self-healing polyurethanes**

## Step 1 – Synthesis of DCD (4,10-dioxatricyclo [5.2.1.02,6] dec-8-ene-3,5-dione)

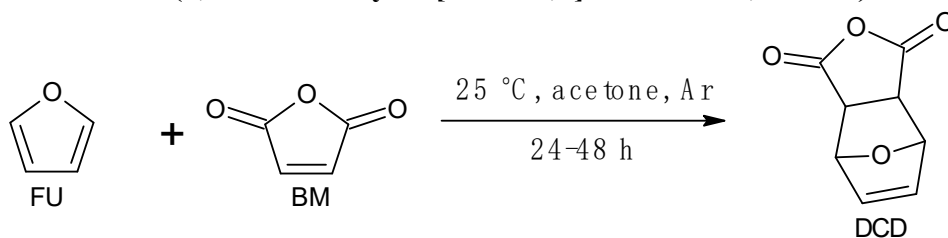

**Figure S2.** Scheme of the reaction of obtaining DCD

**DCD – 4,10-dioxatricyclo [5.2.1.0<sup>2,6</sup>] dec-8-ene-3,5-dione**

**<sup>1</sup>H NMR** (400 MHz, d<sub>6</sub>-DMSO, 298 K) δ (ppm) 6.58 (s, 2H), 5.47 (s, 2H), 3.18 (s, 2H); **<sup>13</sup>C NMR** (400 MHz, d<sub>6</sub>-DMSO, 298 K) δ (ppm) 48.72, 82.23, 137.01, 169.92; **FT-IR (cm<sup>-1</sup>)** 429, 575, 621, 634, 675, 691, 733, 800, 822, 848, 878, 903, 921, 947, 1002, 1019, 1084, 1145, 1193, 1211, 1230, 1243, 1282, 1310, 1569, 1597, 1779, 1857, 2991, 3002, 3034, 3100.

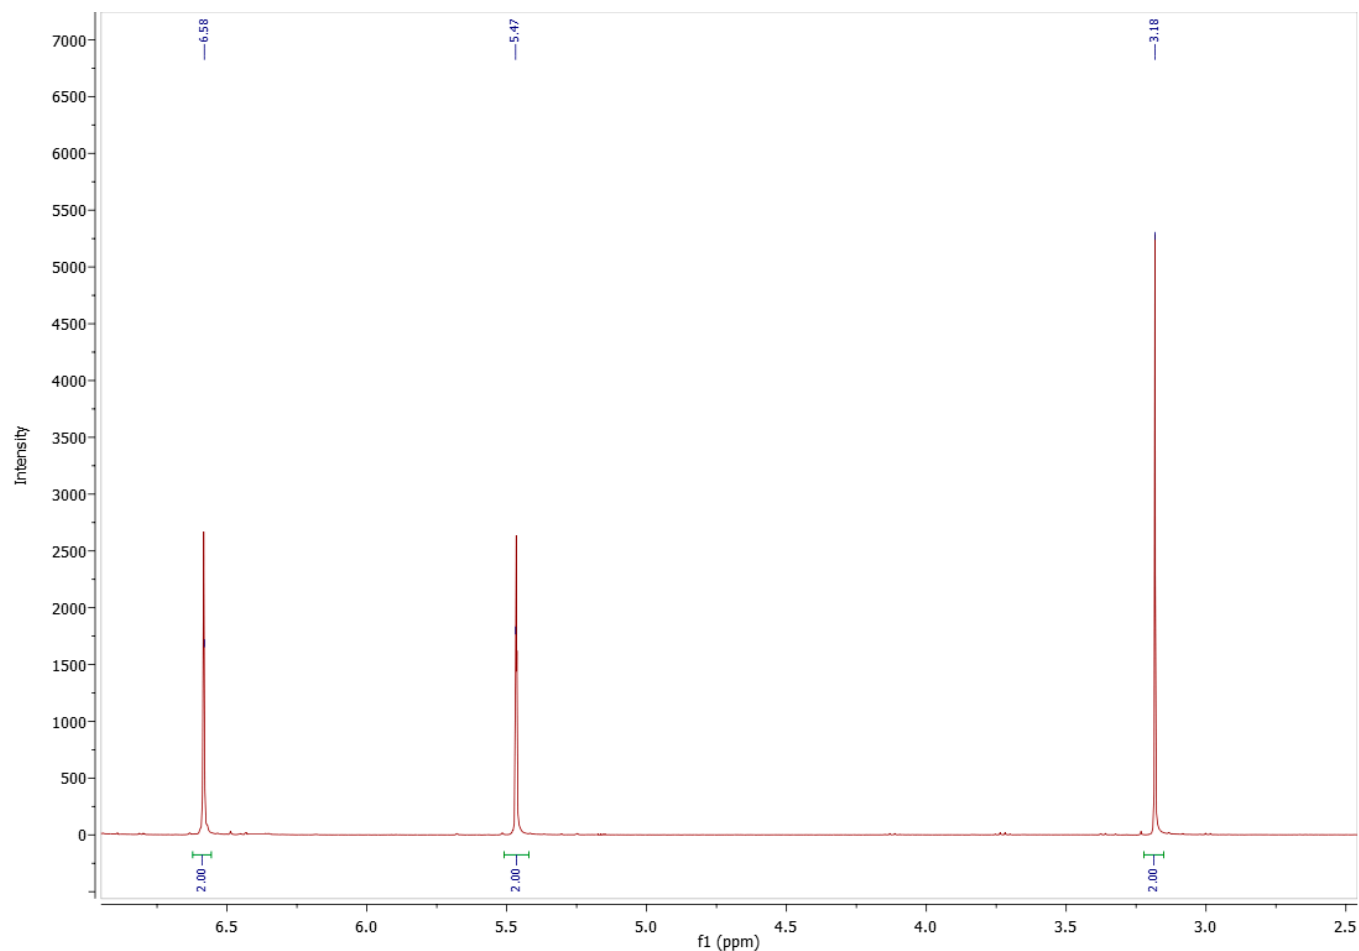

**Figure S3.** <sup>1</sup>H NMR DCD spectrum

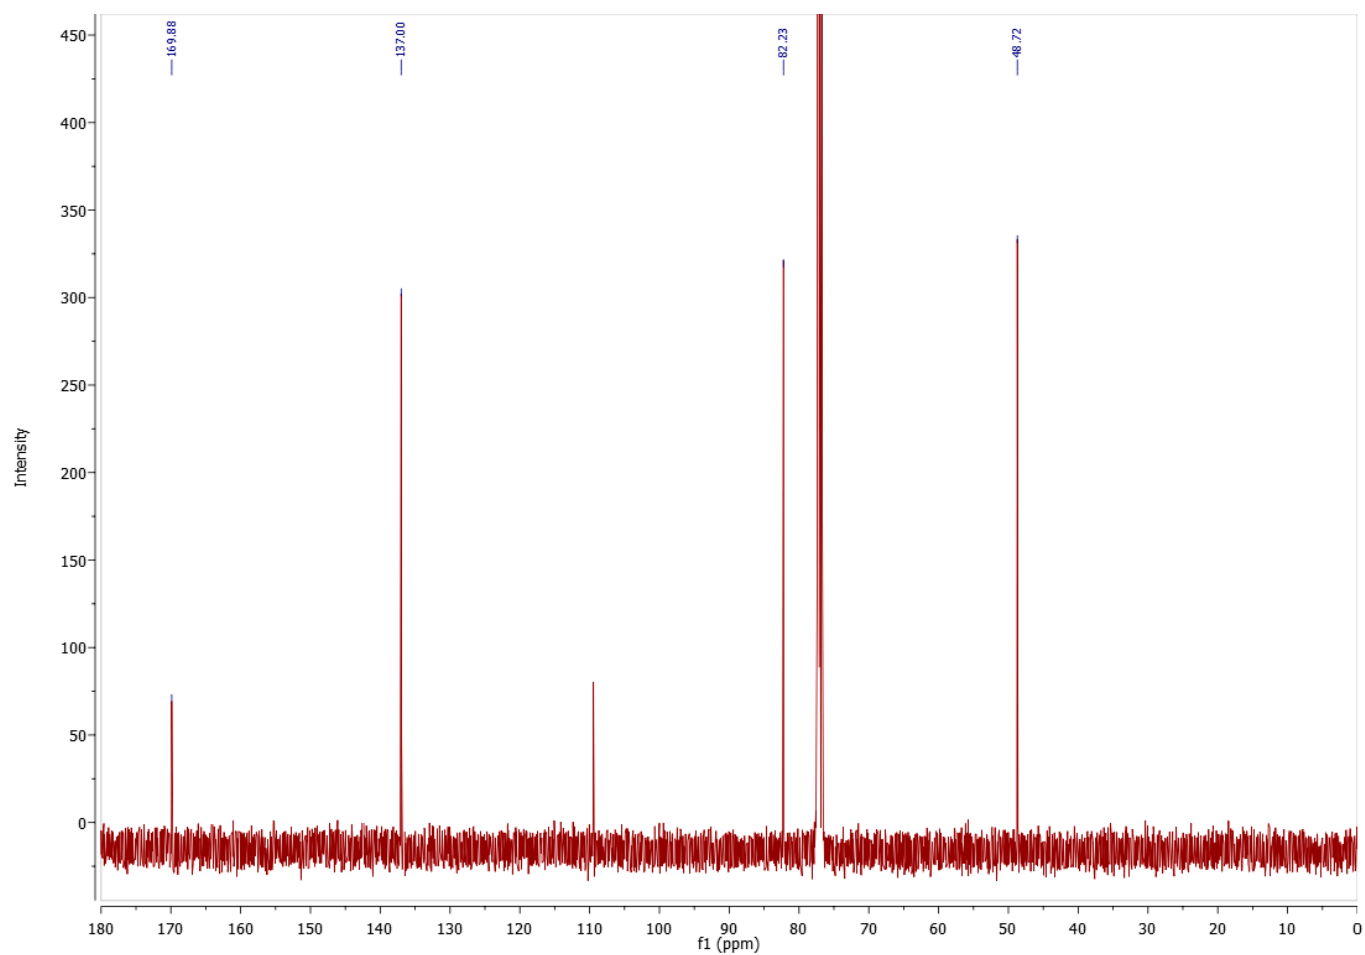

**Figure S4.**  $^{13}\text{C}$  NMR DCD spectrum

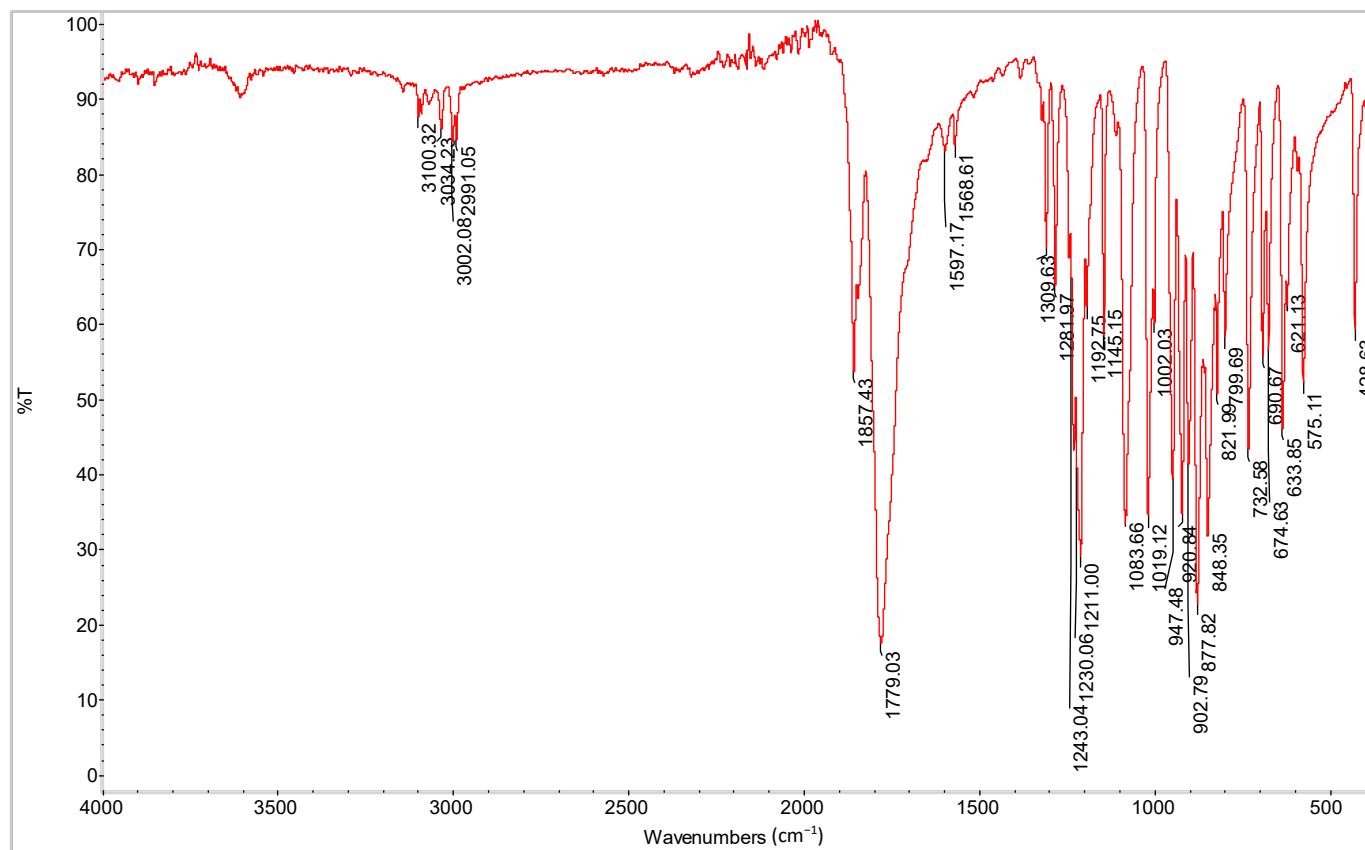

**Figure S5.** ATR-FTIR DCD spectrum

## Step 2 – Synthesis of HAD (4-(2-hydroxyethyl)-10-oxa-4-azatricyclo[5.2.1.0<sup>2,6</sup>]dec-8-ene-3,5-dione)

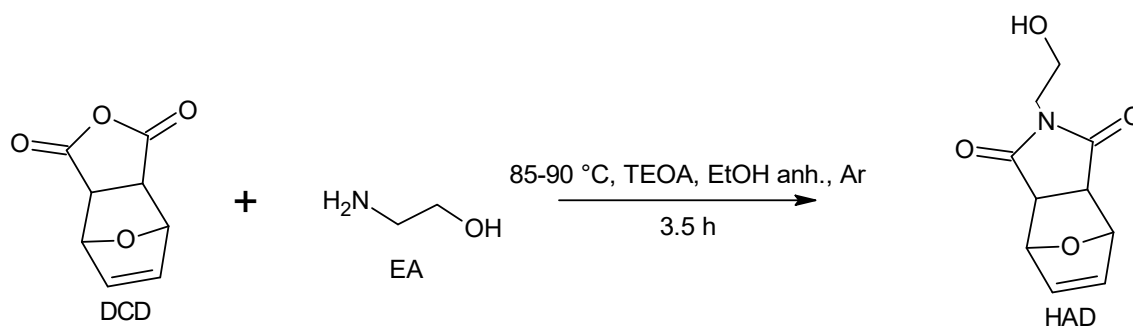

**Figure S6.** Scheme of the reaction of obtaining HAD

### HAD (4-(2-hydroxyethyl)-10-oxa-4-azatricyclo[5.2.1.0<sup>2,6</sup>]dec-8-ene-3,5-dione)

**<sup>1</sup>H NMR** (400 MHz, CDCl<sub>3</sub>, 298 K)  $\delta$  (ppm) 6.53 (s, 2H), 5.28 (s, 2H), 3.77 (t, 2H), 3.67 (t, 2H), 2.90 (s, 2H); **<sup>13</sup>C NMR** (400 MHz, CDCl<sub>3</sub>, 298 K)  $\delta$  (ppm): 176.83; 136.53; 80.97; 60.09; 47.50; 41.71; **FT-IR** (cm<sup>-1</sup>) 430, 487, 565, 596, 628, 654, 705, 722, 772, 807, 850, 874, 917, 938, 959, 1014, 1033, 1053, 1100, 1156, 1168, 1220, 1269, 1317, 1335, 1387, 1405, 1435, 1470, 1683, 1766, 2895, 2932, 2973, 2993, 3008, 3098, 3473.

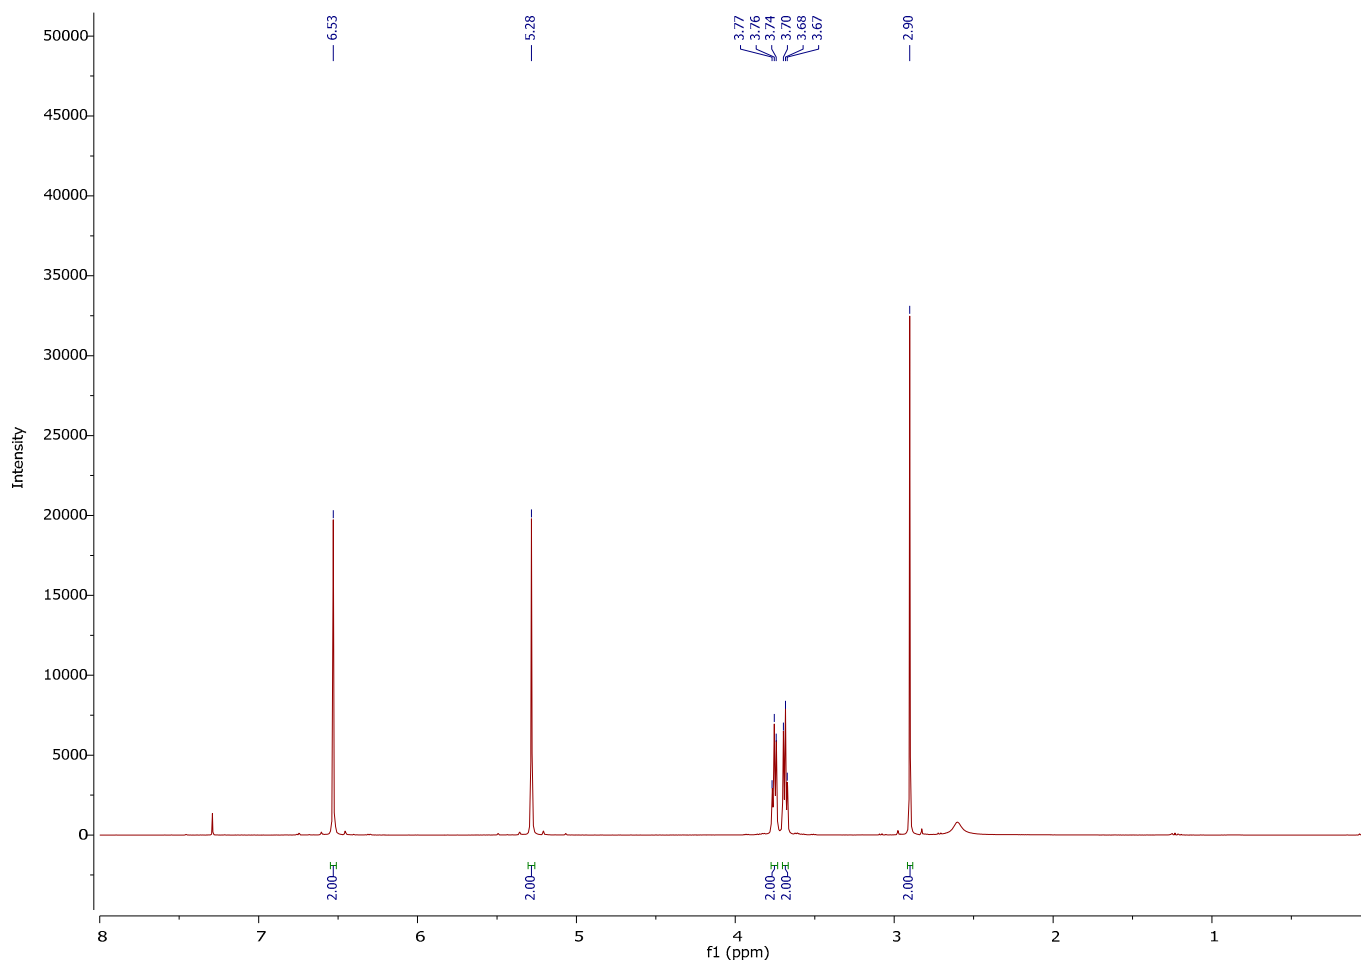

**Figure S7.** <sup>1</sup>H NMR HAD spectrum

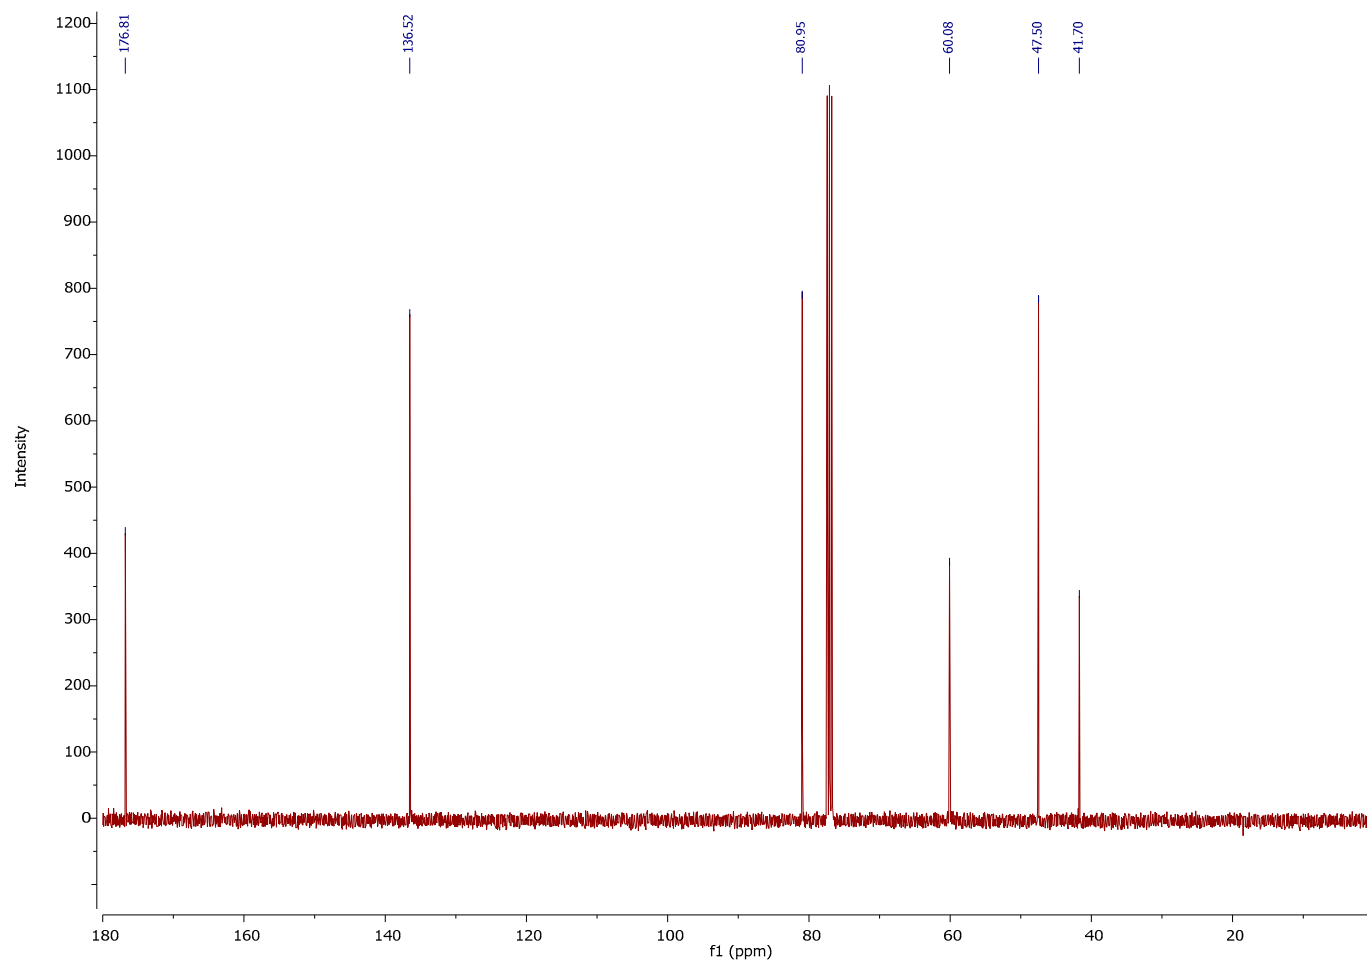

**Figure S8.**  $^{13}\text{C}$  NMR HAD spectrum

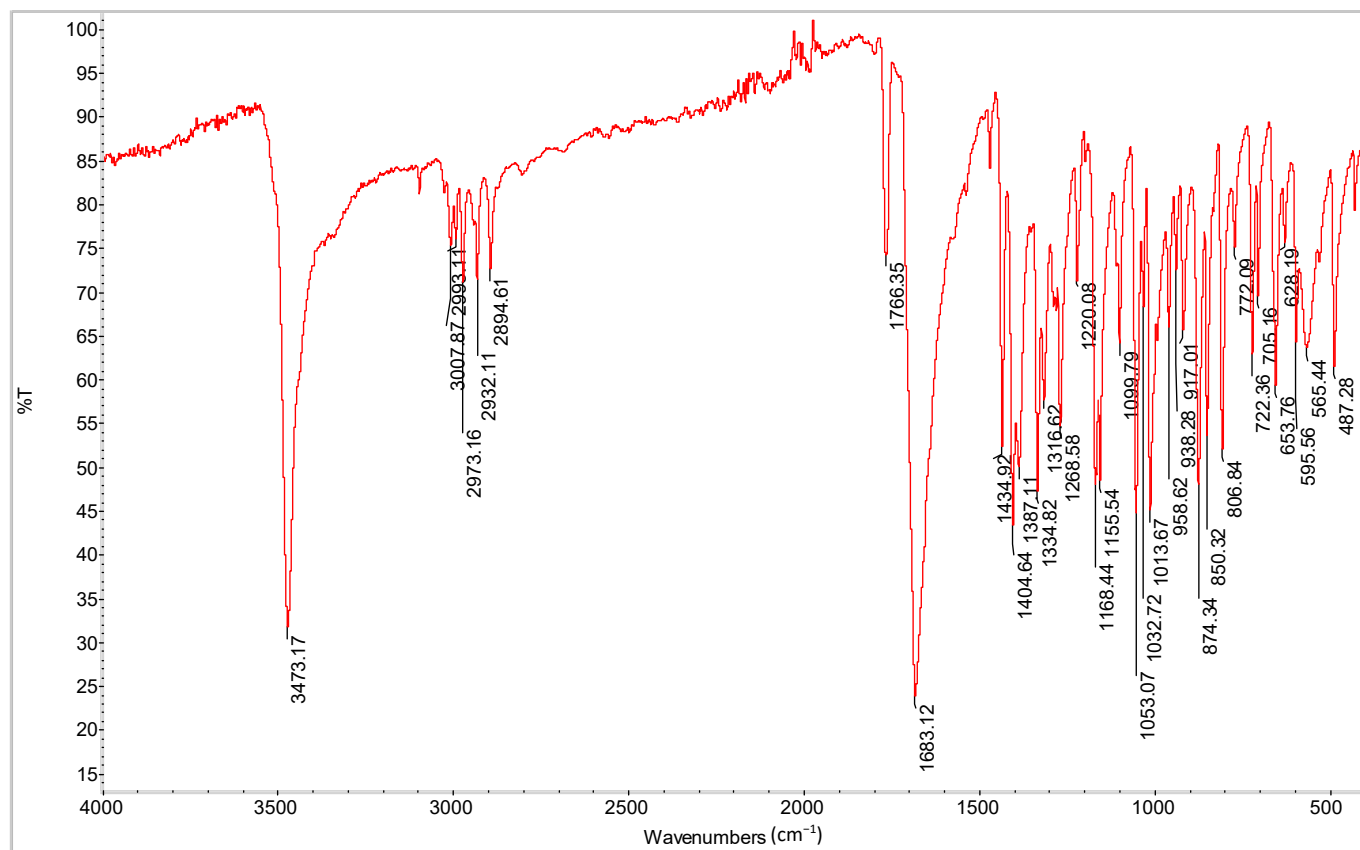

**Figure S9.** ATR-FTIR HAD spectrum

**Step 3 – Synthesis of HPD (1-(2-hydroxyethyl)-1H-pyrrole-2,5-dione)**

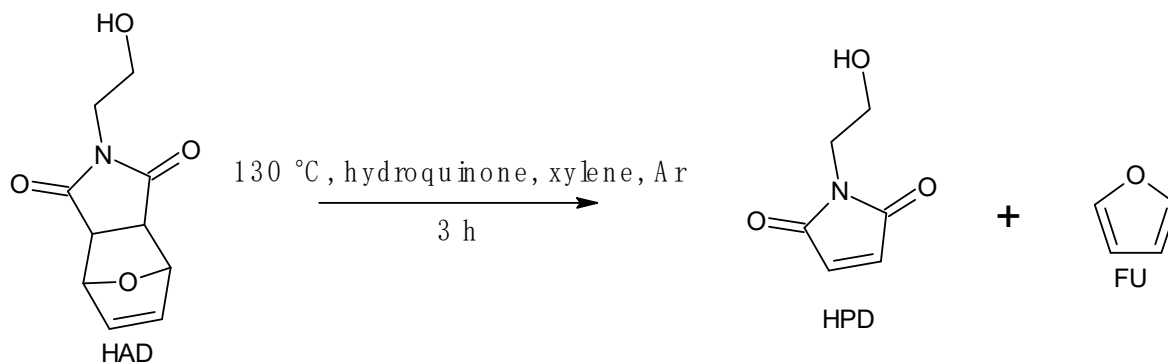

**Figure S10.** Scheme of the reaction of obtaining HPD

**HPD (1-(2-hydroxyethyl)-1H-pyrrole-2,5-dione)**

<sup>1</sup>H NMR (400 MHz, CDCl<sub>3</sub>, 298 K) δ (ppm) 6.75 (s, 2H), 3.77 (t, 2H), 3.71 (q, 2H); <sup>13</sup>C NMR (400 MHz, CDCl<sub>3</sub>, 298 K) δ (ppm): 171.21; 134.24; 60.48; 40.52; FT-IR (cm<sup>-1</sup>) 505, 573, 608, 692, 825, 852, 930, 972, 1052, 1066, 1093, 1157, 1259, 1321, 1362, 1387, 1403, 1441, 1585, 1707, 1750, 1764, 2880, 2932, 2960, 3114, 3257, 3446.



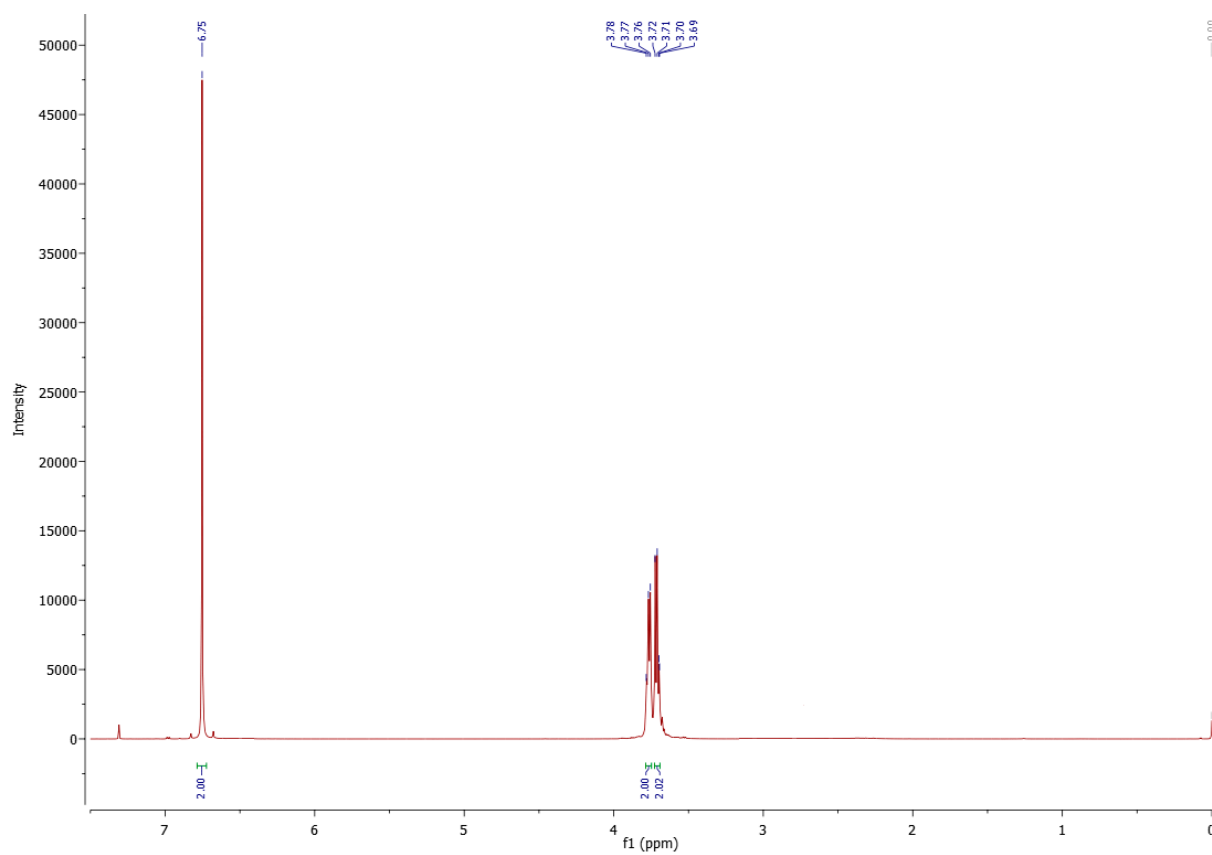

**Figure S2.**  $^1\text{H}$  NMR HPD spectrum

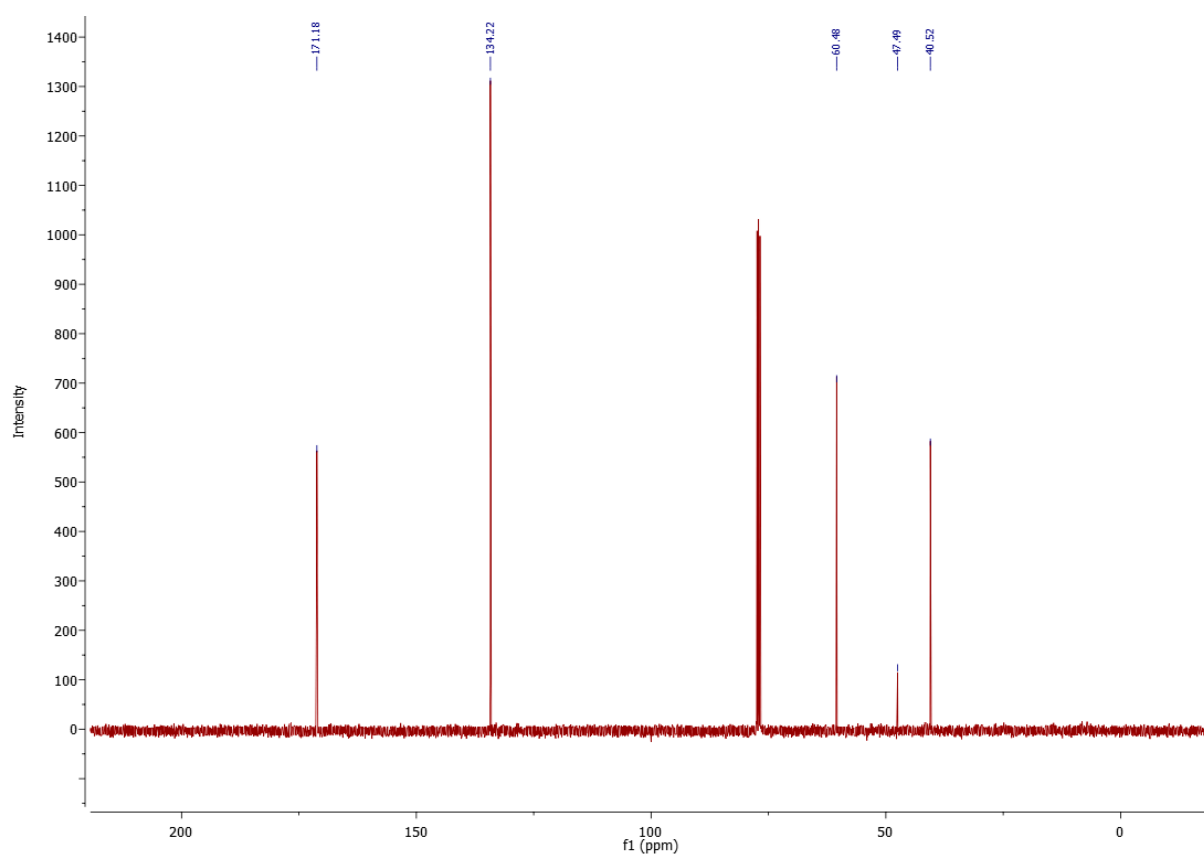

**Figure S3.**  $^{13}\text{C}$  NMR HPD spectrum

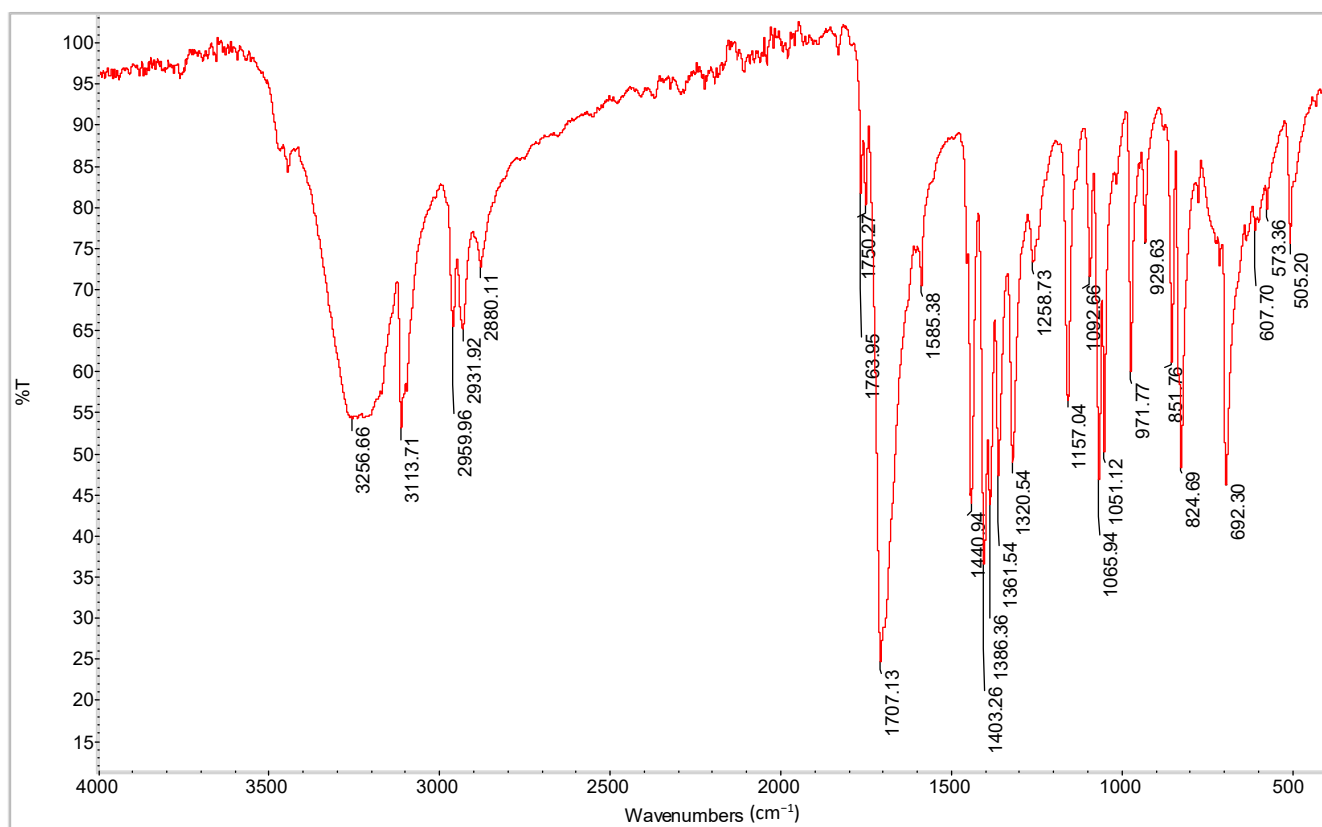

**Figure S4.** ATR-FTIR HPD spectrum

**Step 4 – Synthesis of HODA (Hydroxymethyl)-10-oxatricyclo[5.2.1.0<sup>2,6</sup>]dec-8-ene-3,5-dione-2-aminoethanol)**

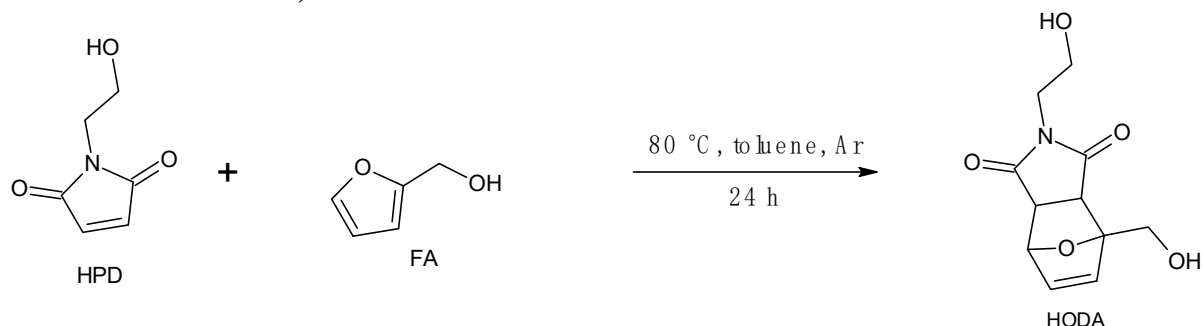

**Figure S5.** Scheme of the reaction of obtaining HODA

**HODA (Hydroxymethyl)-10-oxatricyclo[5.2.1.0<sup>2,6</sup>]dec-8-ene-3,5-dione-2-aminoethanol)**

**<sup>1</sup>H NMR** (400 MHz, CDCl<sub>3</sub>, 298 K)  $\delta$  (ppm) 6.61 (d, 1H), 6.55 (t, 1H), 5.28 (s, 1H), 4.11 (s, 2H), 3.76 (t, 2H), 3.69 (t, 2H), 3.04 (d, 1H), 3.01 (d, 1H), 2.85 (s, 1H), 2.28 (s, 1H); **<sup>13</sup>C NMR** (400 MHz, CDCl<sub>3</sub>, 298 K)  $\delta$  (ppm): 138.31; 136.96; 91.50; 80.96; 60.72; 60.16; 49.99; 48.17; 41.75; **FT-IR (cm<sup>-1</sup>)** 417, 456, 499, 522, 584, 613, 644, 678, 716, 731, 787, 805, 836, 844, 876, 932, 953, 977, 1012, 1036, 1074, 1091, 1111, 1159, 1185, 1248, 1272, 1289, 1303, 1326, 1348, 1363, 1402, 1428, 1681, 1766, 2883, 2917, 2929, 2950, 2978, 3016, 3085, 3428.

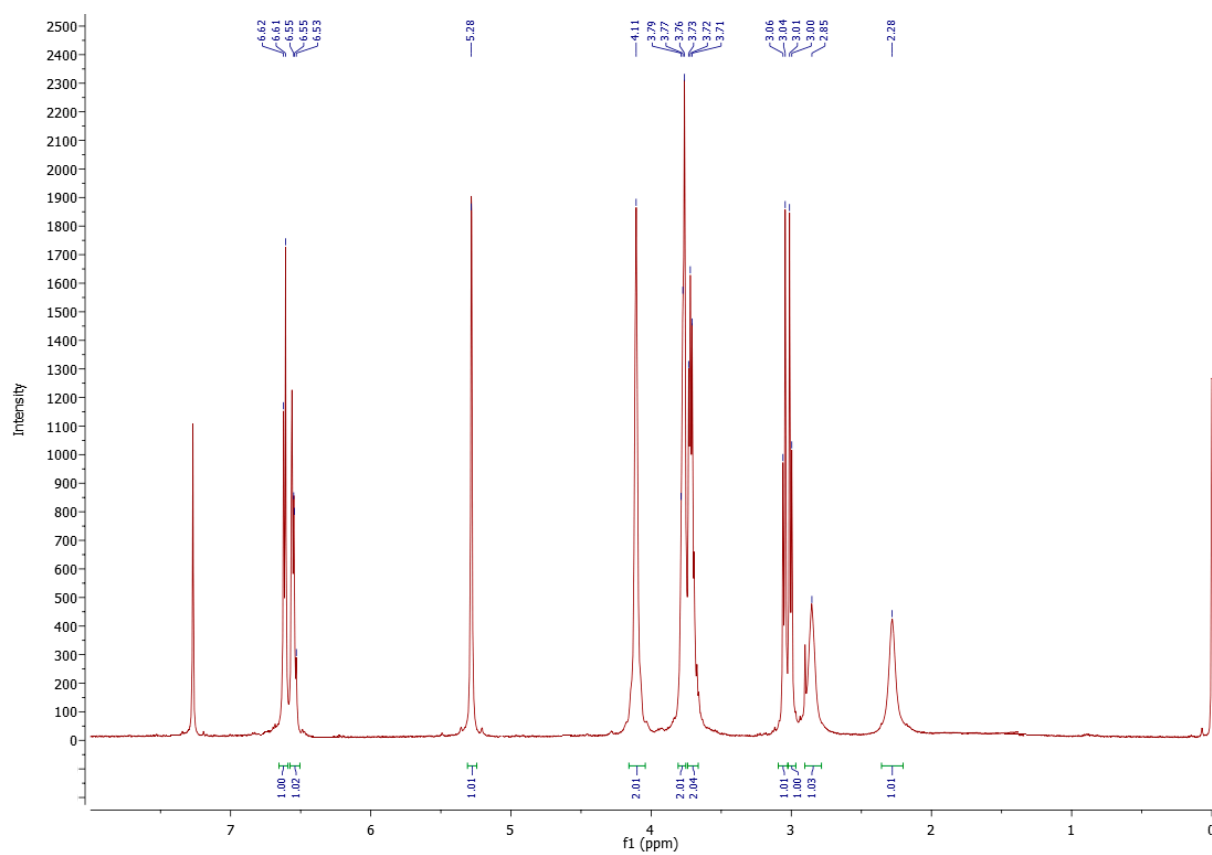

**Figure S6.**  $^1\text{H}$  NMR HODA spectrum

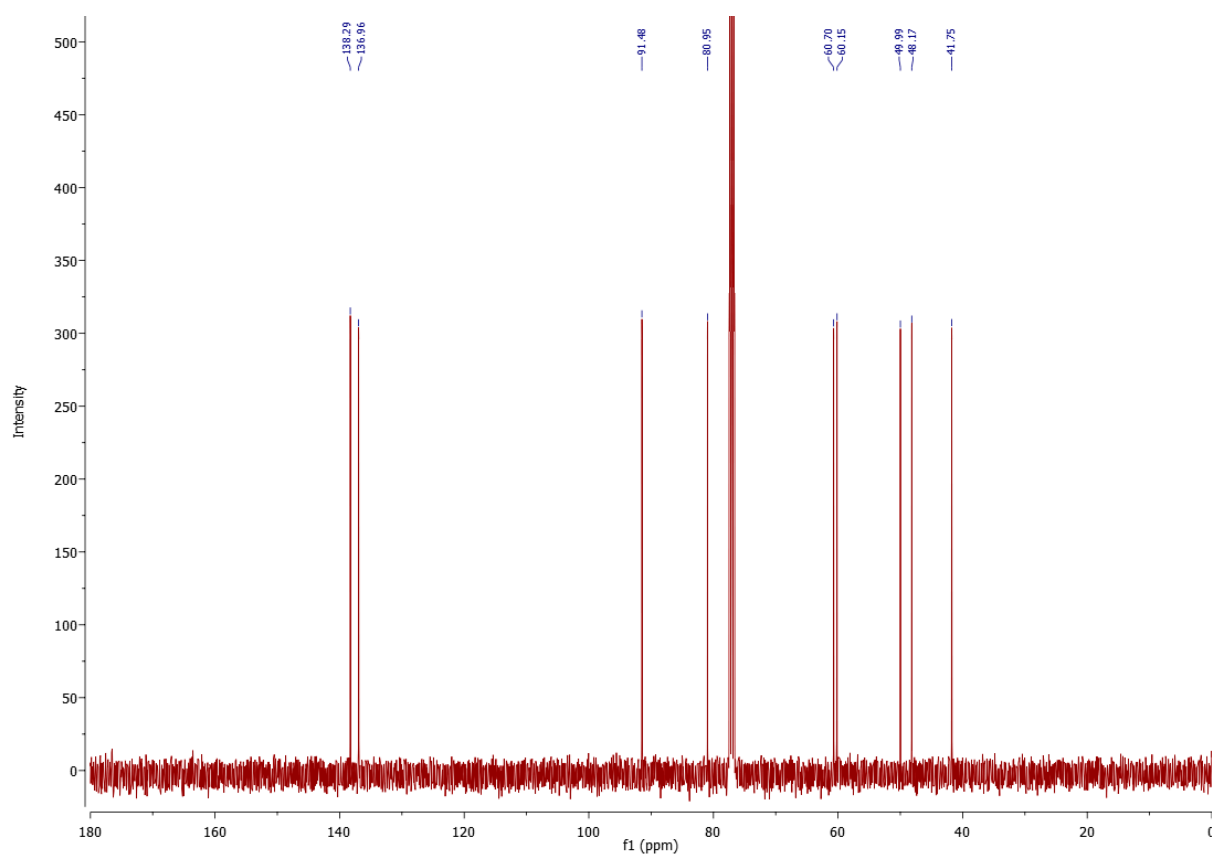

**Figure S7.**  $^{13}\text{C}$  NMR HODA spectrum

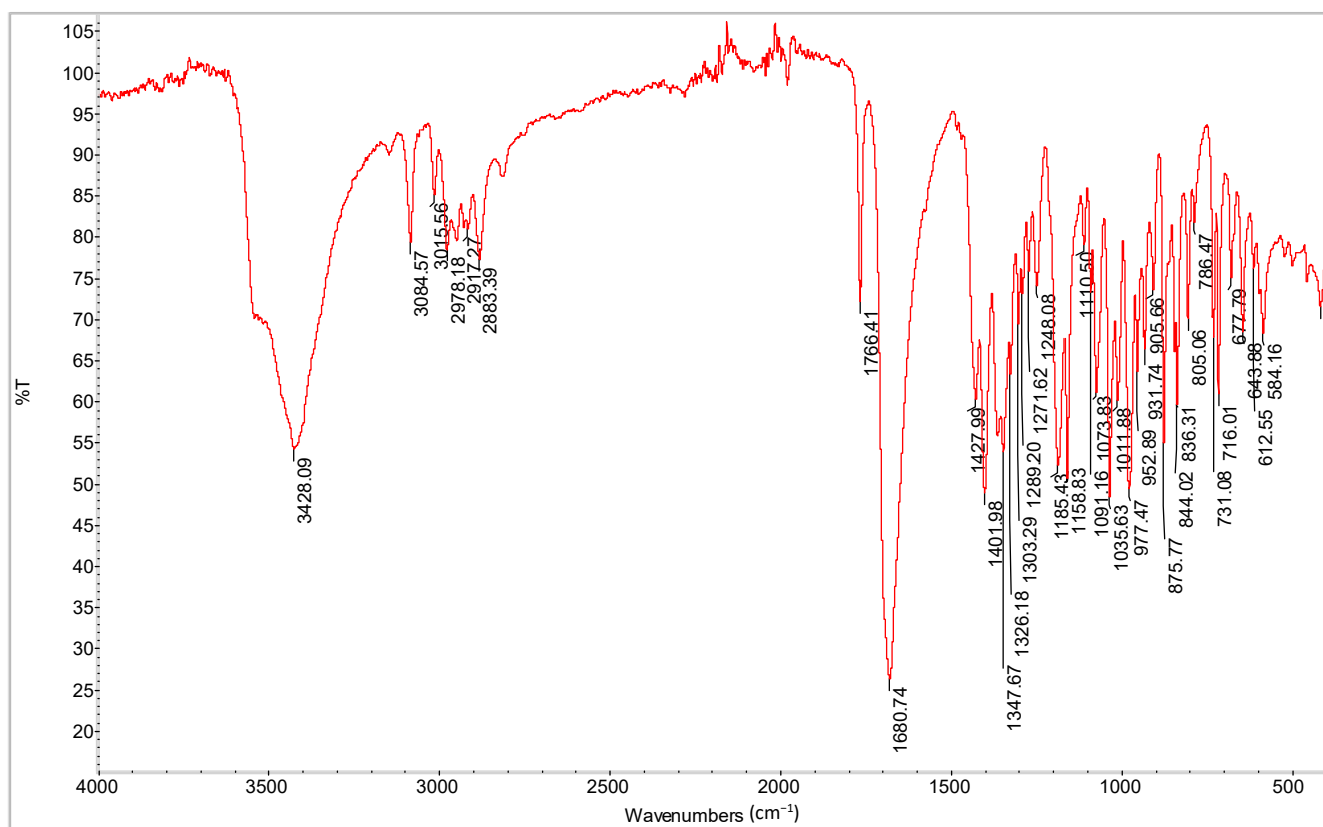

**Figure S8.** ATR-FTIR HODA spectrum

### The FT-IR spectra during the reaction time for the obtained polyurethanes

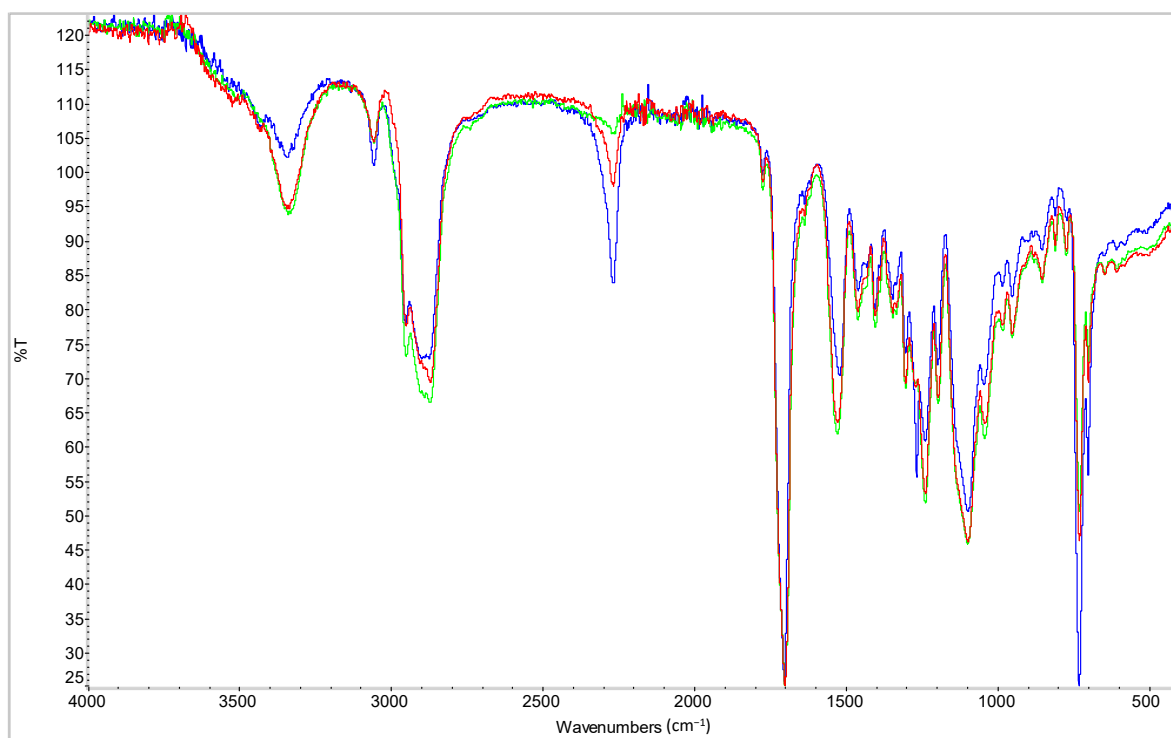

**Figure S18.** Comparison of FTIR spectra investigating the reaction of receiving UA-DA(HEA) after 0 (blue), 1 (red), and 3 h (green) of reaction time. Comparison of FTIR peaks: NCO stretching at  $2270\text{ cm}^{-1}$ .



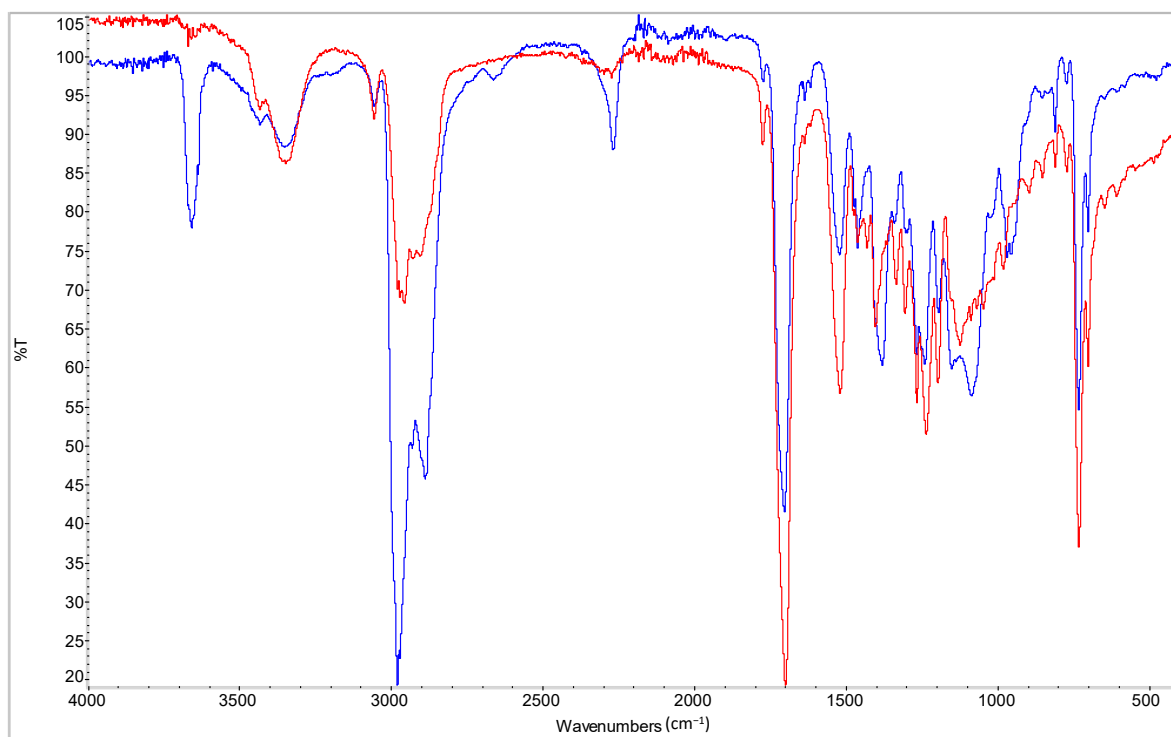

**Figure S19.** Comparison of FTIR spectra investigating the reaction of receiving UA-DA(HPA) after 0 (blue) and 1 h (red) of reaction time. Comparison of FTIR peaks: NCO stretching at 2270 cm<sup>-1</sup>.

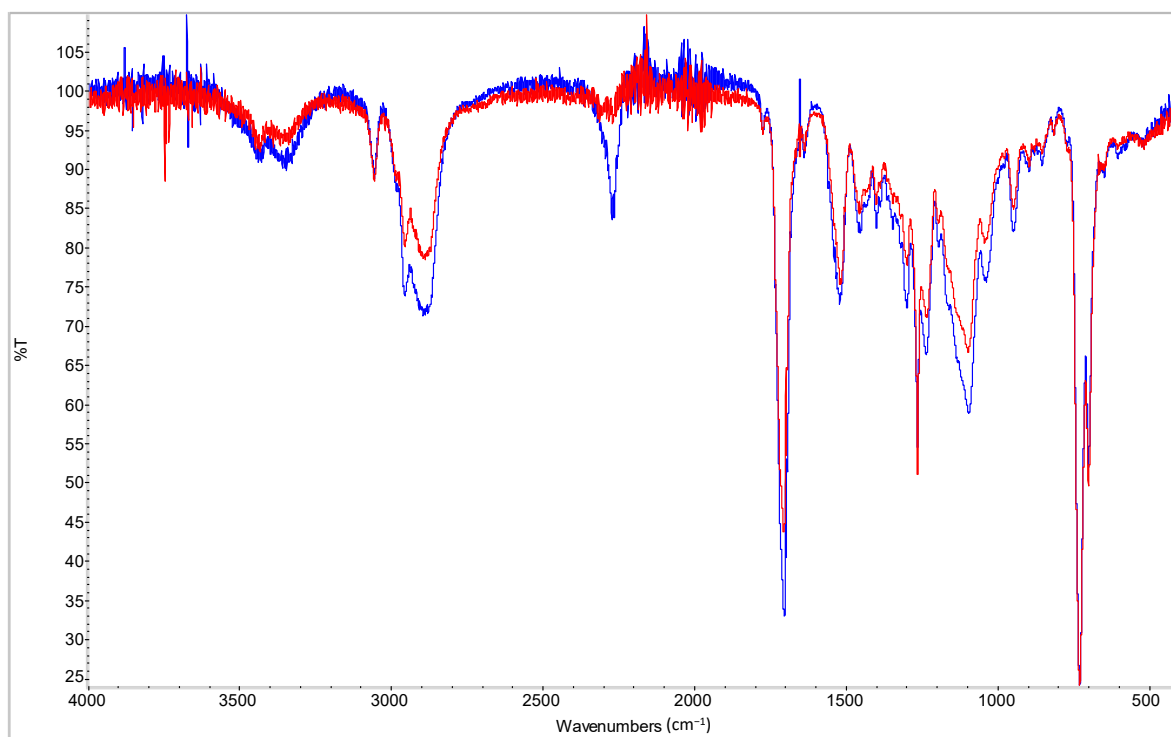

**Figure S9.** Comparison of FTIR spectra investigating the reaction of receiving UA-DA(HEMA) after 0 (blue) and 1 h (red) of reaction time. Comparison of FTIR peaks: NCO stretching at 2270 cm<sup>-1</sup>.

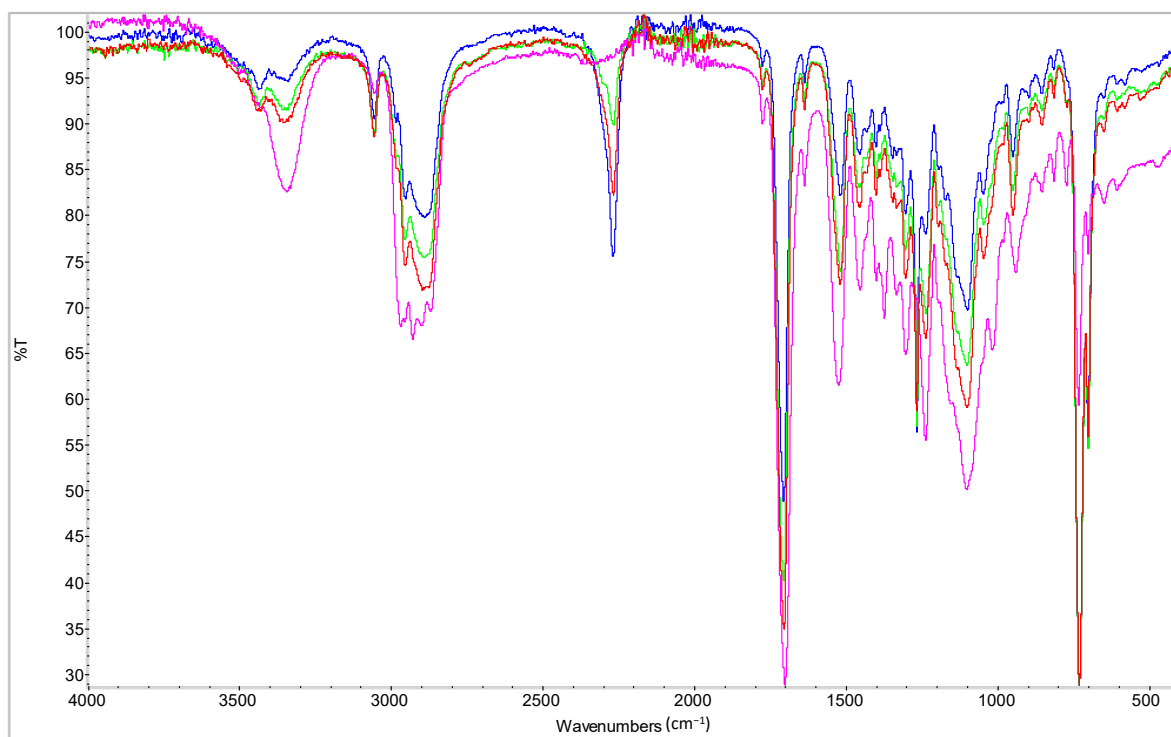

**Figure S10.** Comparison of FTIR spectra investigating the reaction of receiving UA-DA(HPMA) after 0 (blue), 1 (red), 4 (green), and 24 h (pink) of reaction time. Comparison of FTIR peaks: NCO stretching at  $2270 \text{ cm}^{-1}$ .

## The NMR spectra of the obtained polyurethanes

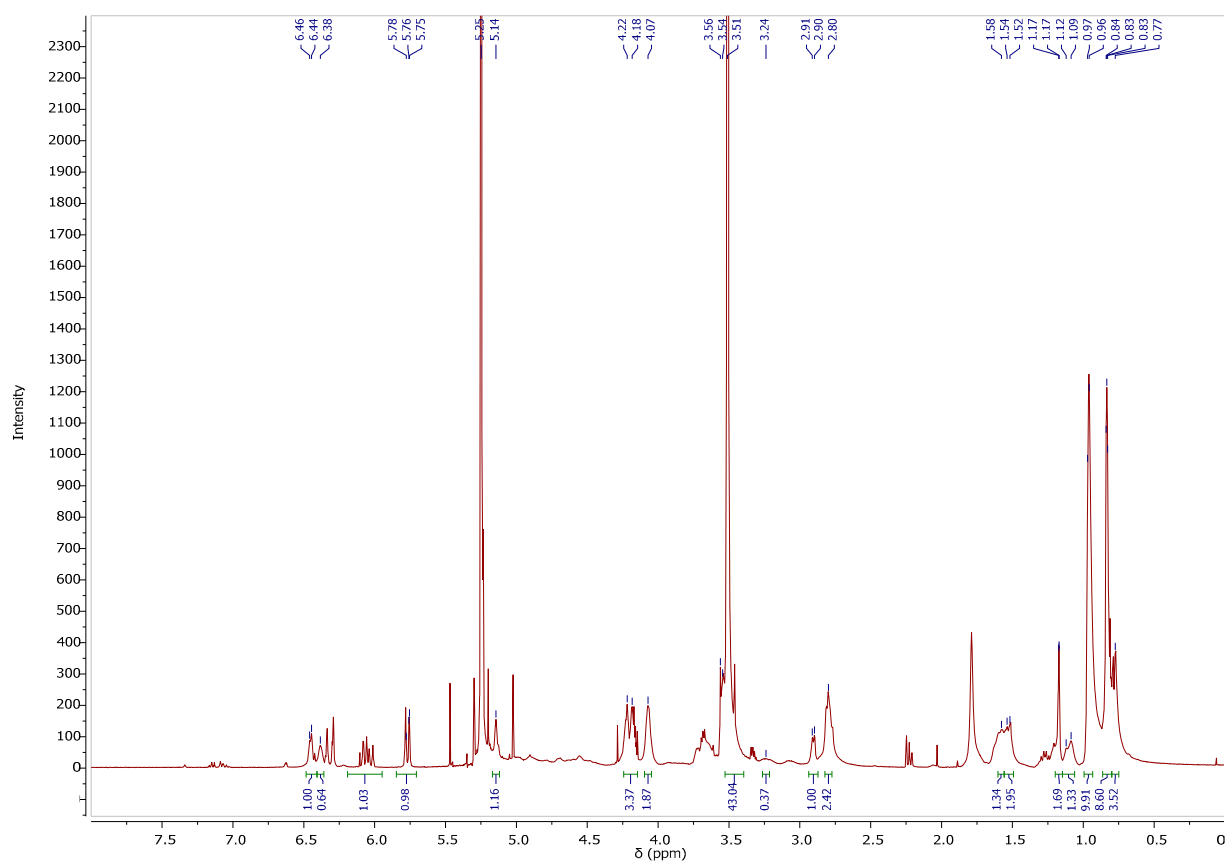

**Figure S22.**  $^1\text{H}$  NMR spectra of UA-DA(HEA).

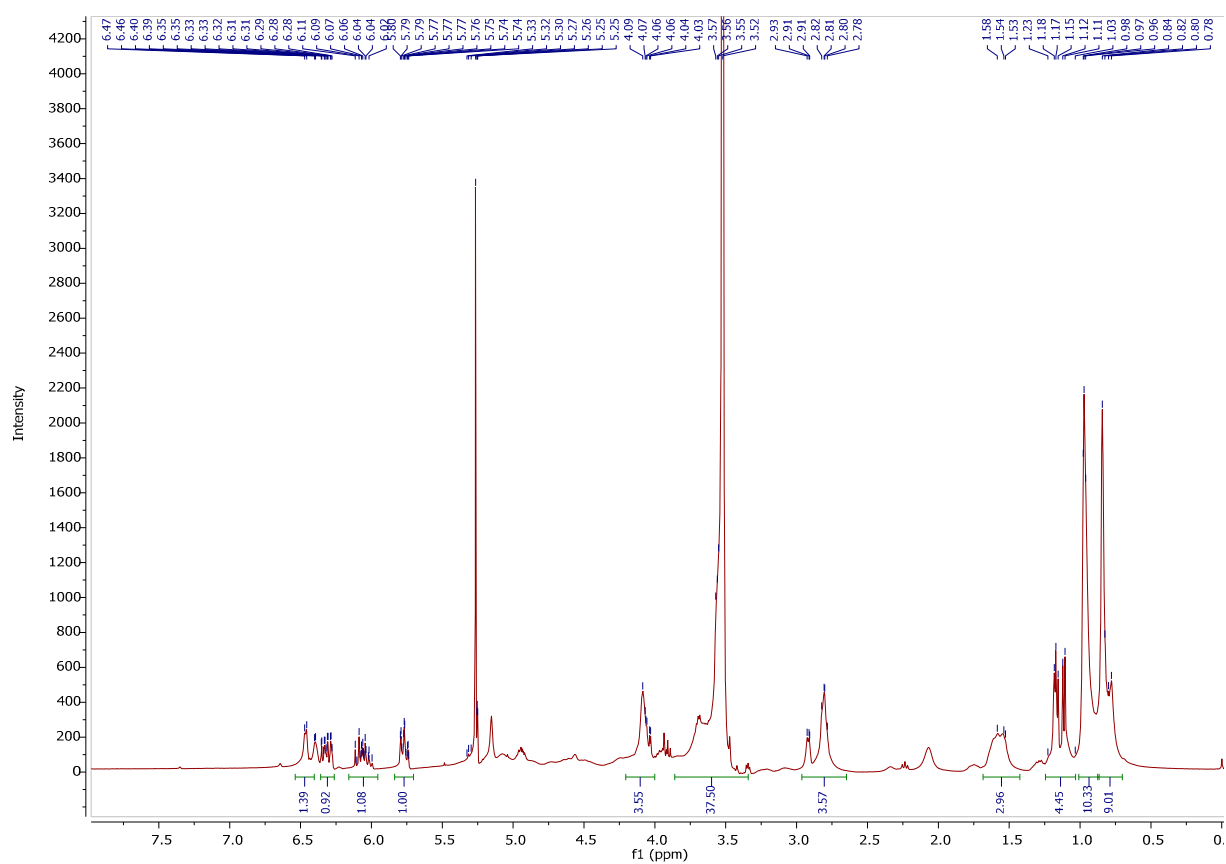

**Figure S23.**  $^1\text{H}$  NMR spectra of UA-DA(HPA).

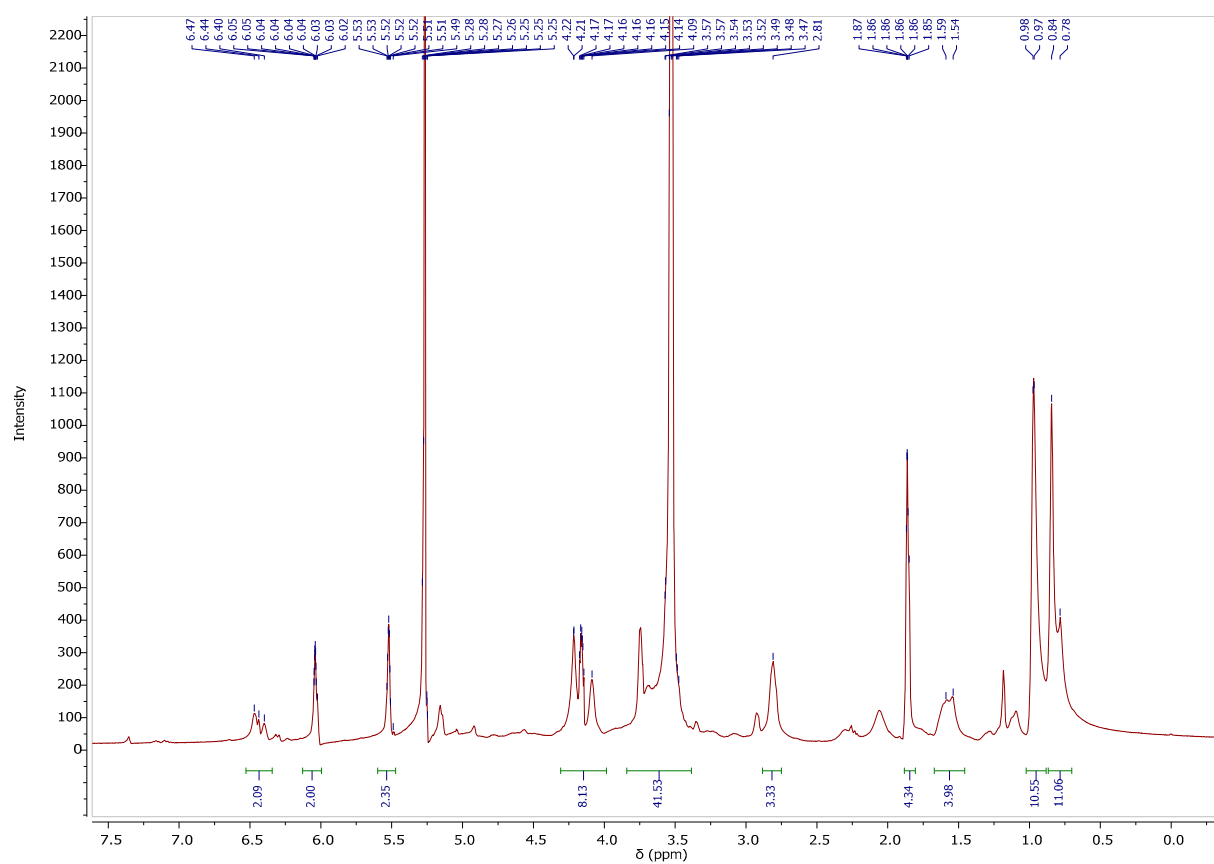

**Figure S24.**  $^1\text{H}$  NMR spectra of UA-DA(HEMA).

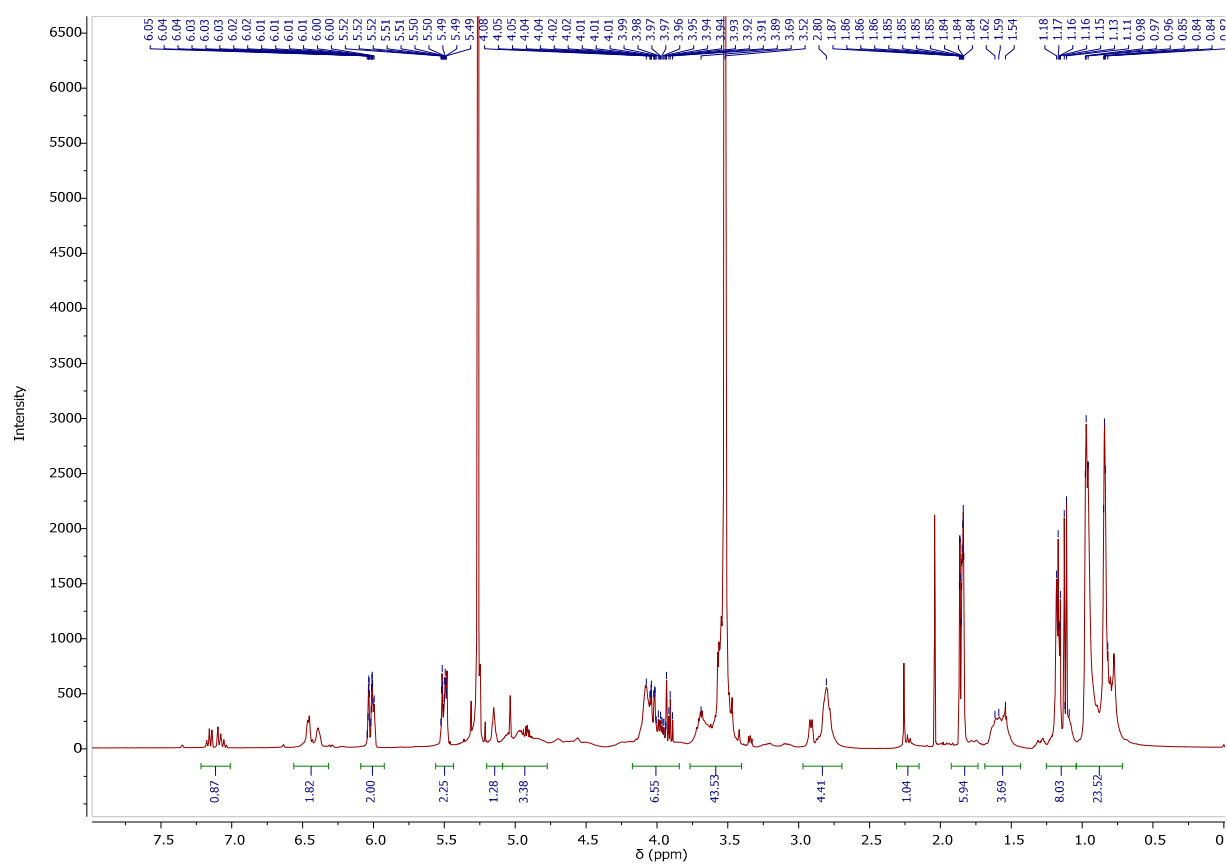

**Figure S25.**  $^1\text{H}$  NMR spectra of UA-DA(HPMA).

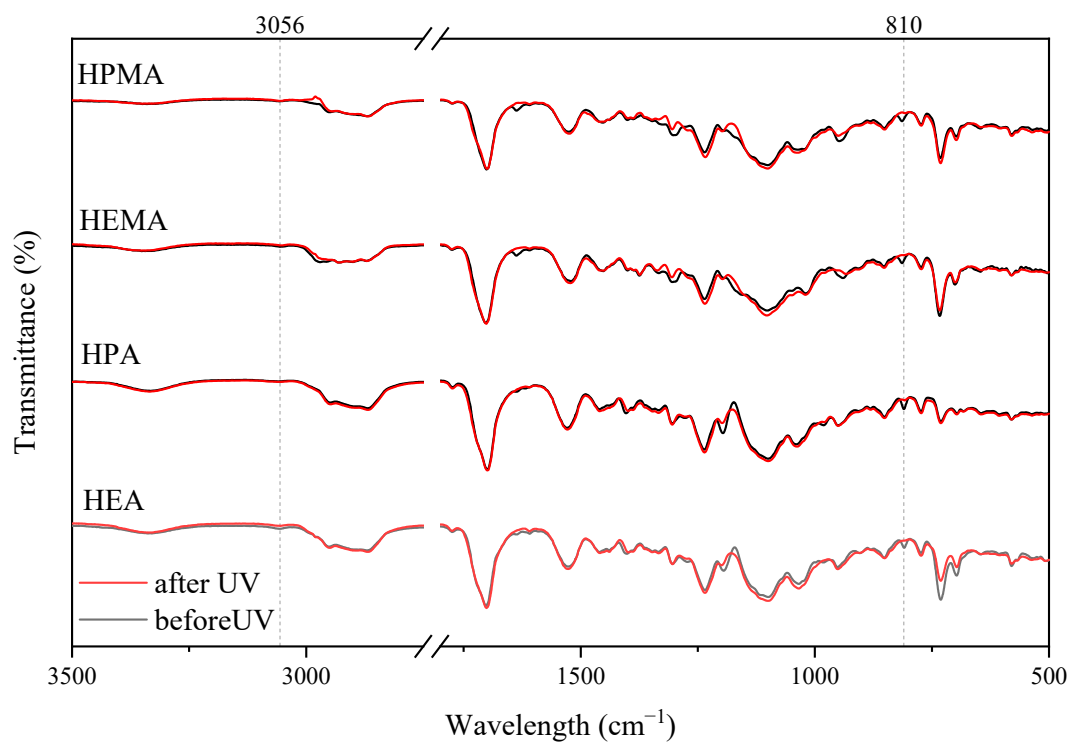

**Figure S26.** FTIR spectra of photoreactive compositions based on obtained resins, before and after UV irradiation.



## The TG and DTG curves of the obtained urethane (meth)acrylates

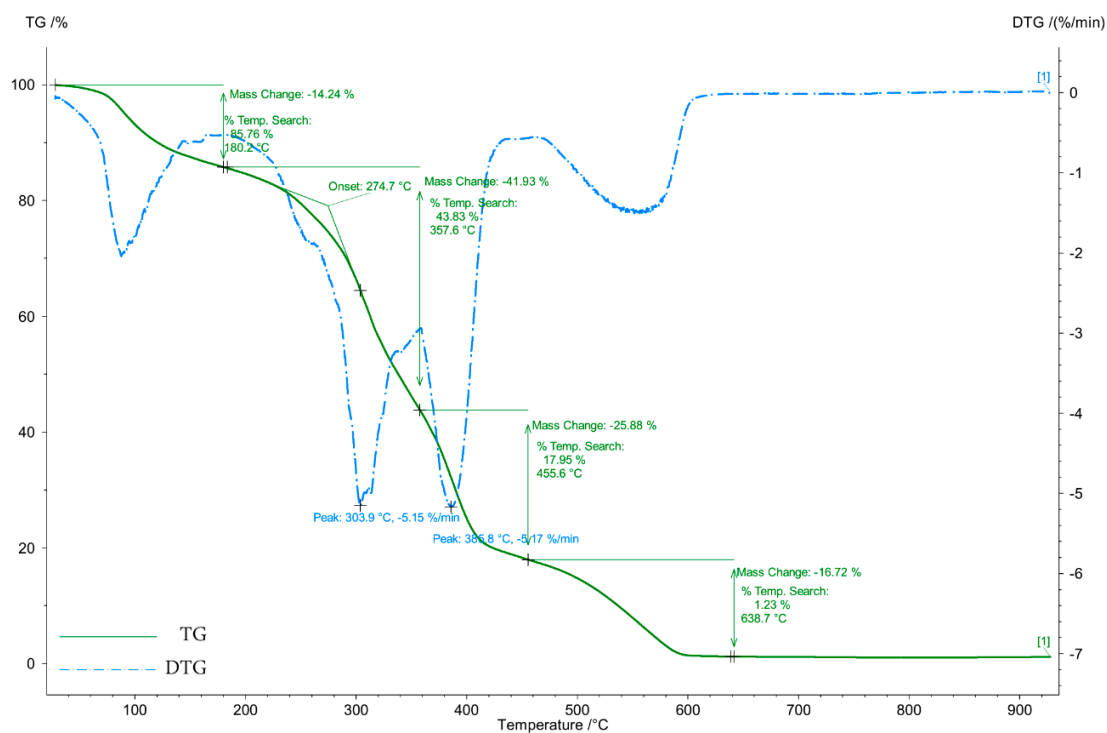

Figure S27. TG and DTG curves of UA-DA(HEA).

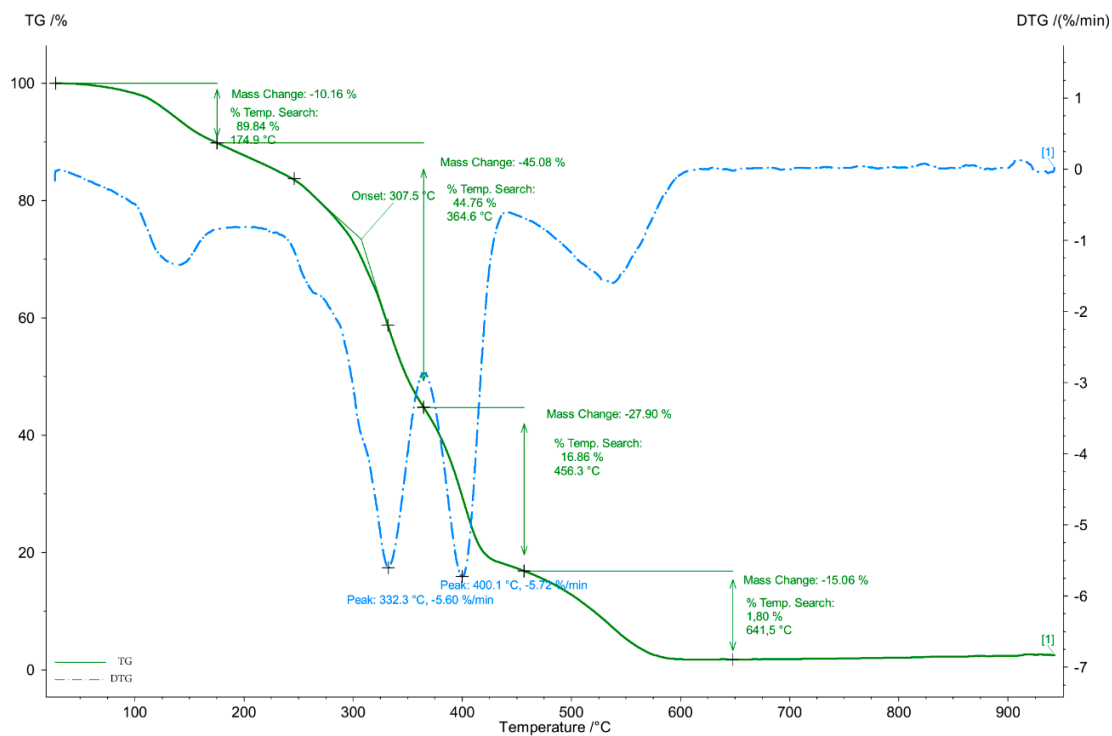

Figure S28. TG and DTG curves of UA-DA(HPA).

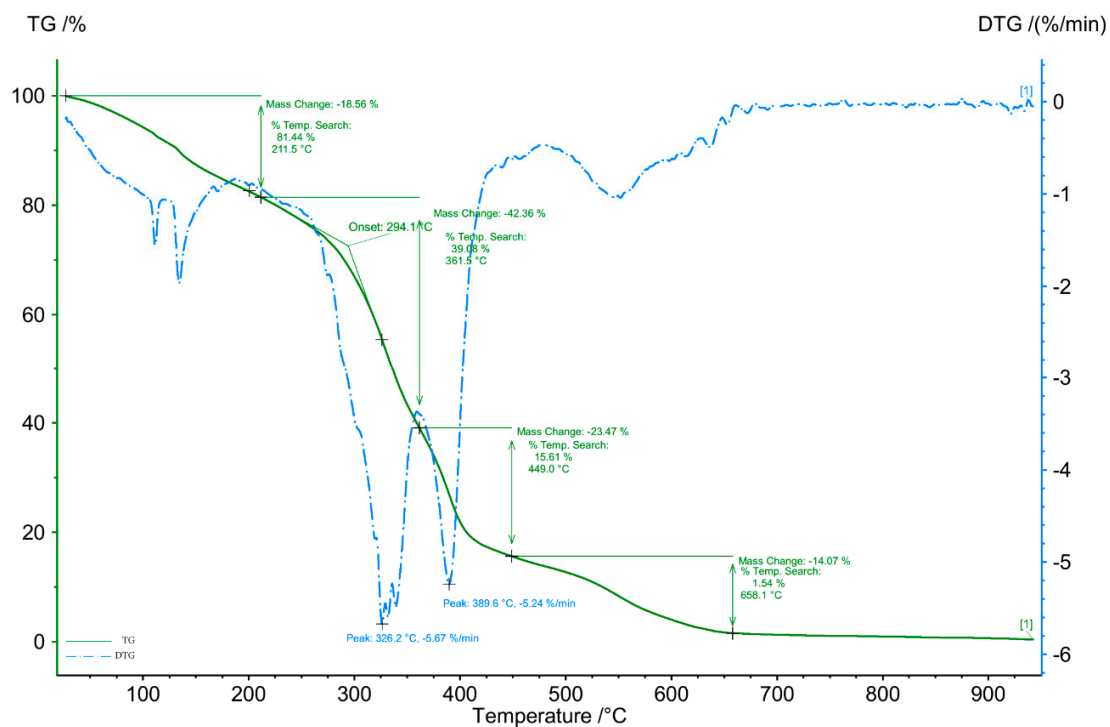

**Figure S29.** TG and DTG curves of UA-DA(HEMA)

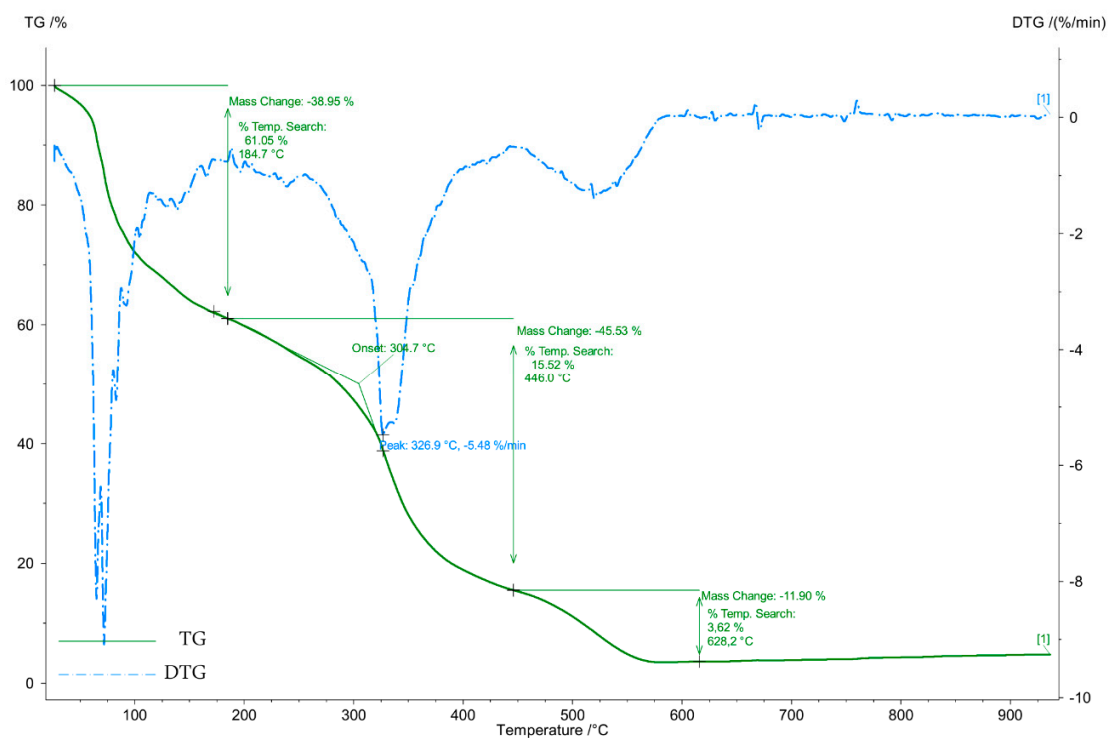

**Figure S30.** TG and DTG curves of UA-DA(HPMA)
